# Supplementary material
Source: publisher figshare collection journal article supplement (https://frontiersin.figshare.com/ndownloader/files/12854993)

## Appendix A

| Infant | Gender | Birth Order | Age in months | # of 5 min segments selected for coding |     |
|--------|--------|-------------|---------------|-----------------------------------------|-----|
|        |        |             |               | Protophone                              | Cry |
| 1      | M      | 2           | 0             | -                                       | -   |
|        |        |             | 1             | -                                       | -   |
|        |        |             | 3             | 5                                       | 5   |
| 2      | F      | 1           | 0             | -                                       | -   |
|        |        |             | 1             | -                                       | -   |
|        |        |             | 3             | 5                                       | 5   |
| 3      | M      | 2           | 0             | 5                                       | 5   |
|        |        |             | 1             | 5                                       | 5   |
|        |        |             | 3             | -                                       | -   |
| 4      | F      | 2           | 0             | 5                                       | 5   |
|        |        |             | 1             | 5                                       | 5   |
|        |        |             | 3             | -                                       | -   |
| 5      | F      | 2           | 0             | -                                       | -   |
|        |        |             | 1             | 5                                       | 5   |
|        |        |             | 3             | 5                                       | 5   |
| 6      | M      | 1           | 0             | 5                                       | 5   |
|        |        |             | 1             | 5                                       | 5   |
|        |        |             | 3             | 5                                       | 5   |
| 7      | M      | 2           | 0             | 5                                       | 5   |
|        |        |             | 1             | 5                                       | 5   |
|        |        |             | 3             | 5                                       | 5   |
| 8      | M      | 1           | 0             | 5                                       | 5   |
|        |        |             | 1             | 5                                       | 5   |
|        |        |             | 3             | 5                                       | 5   |
| 9      | M      | 3           | 0             | 5                                       | 5   |
|        |        |             | 1             | 5                                       | 5   |
|        |        |             | 3             | 5                                       | 5   |
| 10     | F      | 1           | 0             | 5                                       | 5   |
|        |        |             | 1             | 5                                       | 5   |
|        |        |             | 3             | 5                                       | 5   |
| 11     | F      | 2           | 0             | 5                                       | 5   |
|        |        |             | 1             | 5                                       | 5   |
|        |        |             | 3             | 5                                       | 5   |
| 12     | F      | 1           | 0             | 5                                       | 5   |
|        |        |             | 1             | 5                                       | 5   |
|        |        |             | 3             | 5                                       | 5   |

## Appendix B

| Infant | Age in months | # of infant utterances |     | # of caregiver utterances (IDS and ADS) | # of IDS utterances | # of IDS responses <sup>a</sup> |        | # of IDS responses/<br># of infant utterances |     |
|--------|---------------|------------------------|-----|-----------------------------------------|---------------------|---------------------------------|--------|-----------------------------------------------|-----|
|        |               | Prot                   | Cry |                                         |                     | To Prot                         | To Cry | Prot                                          | Cry |
| 1      | 0             | -                      | -   | -                                       | -                   | -                               | -      | -                                             | -   |
|        | 1             | -                      | -   | -                                       | -                   | -                               | -      | -                                             | -   |
|        | 3             | 719                    | 90  | 383                                     | 383                 | 237                             | 41     | .33                                           | .46 |
| 2      | 0             | -                      | -   | -                                       | -                   | -                               | -      | -                                             | -   |
|        | 1             | -                      | -   | -                                       | -                   | -                               | -      | -                                             | -   |
|        | 3             | 356                    | 12  | 337                                     | 337                 | 111                             | 5      | .31                                           | .41 |
| 3      | 0             | 631                    | 29  | 45                                      | 44                  | 26                              | 2      | .04                                           | .06 |
|        | 1             | 833                    | 247 | 51                                      | 51                  | 33                              | 15     | .04                                           | .06 |
|        | 3             | -                      | -   | -                                       | -                   | -                               | -      | -                                             | -   |
| 4      | 0             | 659                    | 401 | 305                                     | 200                 | 107                             | 82     | .16                                           | .20 |
|        | 1             | 912                    | 91  | 91                                      | 91                  | 65                              | 5      | .07                                           | .05 |
|        | 3             | -                      | -   | -                                       | -                   | -                               | -      | -                                             | -   |
| 5      | 0             | -                      | -   | -                                       | -                   | -                               | -      | -                                             | -   |
|        | 1             | 289                    | 167 | 228                                     | 228                 | 81                              | 25     | .28                                           | .15 |
|        | 3             | 387                    | 204 | 138                                     | 138                 | 46                              | 19     | .12                                           | .09 |
| 6      | 0             | 730                    | 569 | 302                                     | 291                 | 90                              | 70     | .12                                           | .12 |
|        | 1             | 1149                   | 684 | 209                                     | 207                 | 107                             | 60     | .09                                           | .09 |
|        | 3             | 1013                   | 26  | 392                                     | 392                 | 243                             | 2      | .24                                           | .08 |
| 7      | 0             | 477                    | 90  | 43                                      | 22                  | 15                              | 1      | .03                                           | .01 |
|        | 1             | 456                    | 36  | 29                                      | 29                  | 18                              | 2      | .04                                           | .06 |
|        | 3             | 288                    | 21  | 112                                     | 112                 | 37                              | 5      | .13                                           | .24 |
| 8      | 0             | 808                    | 287 | 399                                     | 399                 | 228                             | 66     | .28                                           | .23 |
|        | 1             | 647                    | 278 | 333                                     | 333                 | 160                             | 81     | .25                                           | .30 |
|        | 3             | 868                    | 73  | 393                                     | 393                 | 275                             | 18     | .32                                           | .25 |
| 9      | 0             | 849                    | 31  | 167                                     | 6                   | 6                               | 0      | .01                                           | 0   |
|        | 1             | 474                    | 1   | 148                                     | 148                 | 20                              | 0      | .04                                           | 0   |
|        | 3             | 635                    | 58  | 31                                      | 31                  | 21                              | 1      | .03                                           | .02 |
| 10     | 0             | 142                    | 30  | 266                                     | 266                 | 77                              | 16     | .54                                           | .53 |
|        | 1             | 136                    | 36  | 188                                     | 188                 | 31                              | 22     | .23                                           | .61 |
|        | 3             | 295                    | 100 | 157                                     | 157                 | 47                              | 2      | .16                                           | .02 |
| 11     | 0             | 477                    | 297 | 261                                     | 85                  | 63                              | 16     | .13                                           | .05 |
|        | 1             | 403                    | 76  | 50                                      | 50                  | 28                              | 8      | .07                                           | .11 |
|        | 3             | 525                    | 50  | 100                                     | 100                 | 33                              | 12     | .06                                           | .24 |
| 12     | 0             | 537                    | 371 | 403                                     | 384                 | 166                             | 102    | .31                                           | .27 |
|        | 1             | 687                    | 308 | 168                                     | 168                 | 83                              | 41     | .12                                           | .13 |
|        | 3             | 412                    | 115 | 191                                     | 191                 | 79                              | 6      | .19                                           | .05 |

IDS = Infant-Directed Speech, ADS = Adult-Directed Speech, Prot = Protophones

# of IDS utterances = total number of utterances of caregivers that were directed toward infants, some of which could be counted as responses to infant protophones or cries, and some of which were continuations of talk by the caregiver.

# of IDS responses = Number of caregiver IDS utterances that occurred as responses to infant protophones or cries; only the *first* IDS utterance in each caregiver sequence following the onset of an infant utterance was counted as a response. In addition any IDS utterance starting more than 5 sec after the offset of an infant utterance was not treated as a response.

<sup>a</sup> In 18 segments there were NO IDS responses even though there were infant protophones and/or cries and cases of IDS.

A minus sign (-) indicates that no recording was available for the infant at the designated age.

## Appendix C

(A) Wail cry (high distress) with a strongly dysphoned portion of its nucleus

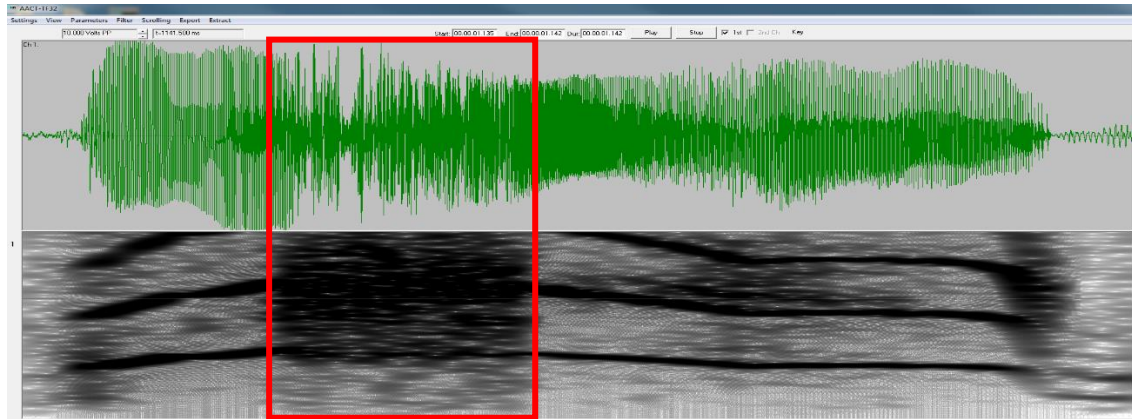

(B) Wail cry with catch breath at the end of a nucleus including both normally phonated and dysphoned portions

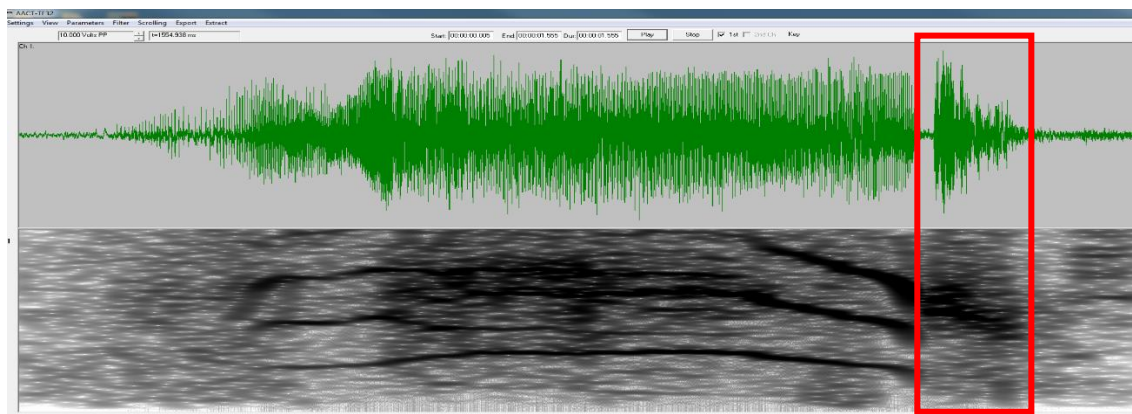

(C) Whimper (low distress): nucleus and glottal burst

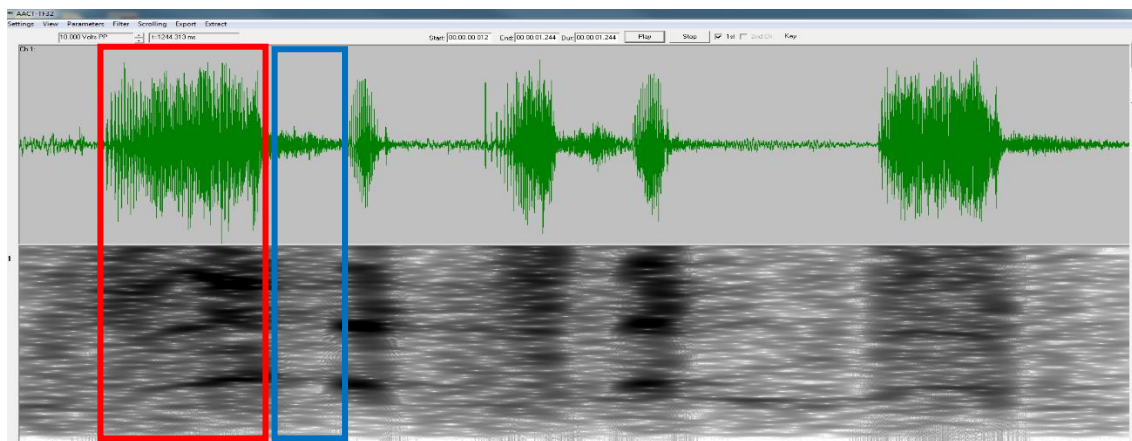

Supplement: Supplementary file [file 12854993]
